# Supplementary figures and images for: A gut–brain neural circuit controlled by intestinal gluconeogenesis is crucial in metabolic health
Source: PubMed Central journal article supplement — Mol Metab. 2014 Dec 26;4(2):106–17. doi: 10.1016/j.molmet.2014.12.009 (PMC4314540; doi:10.1016/j.molmet.2014.12.009), 2014-12-26

Supplementary Figure.1

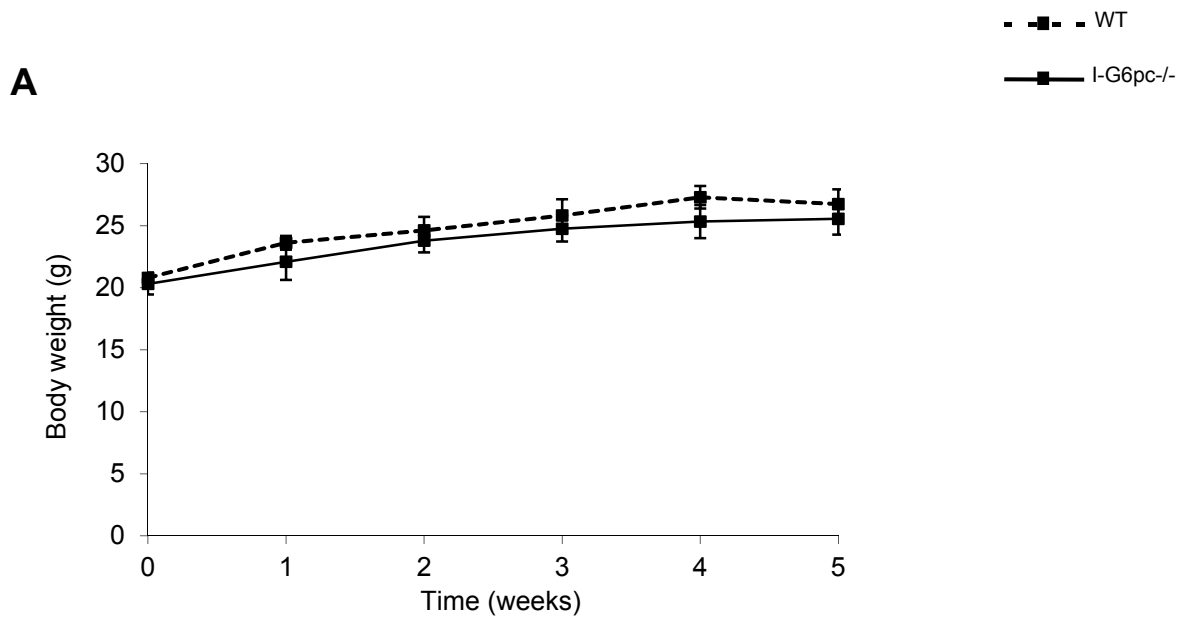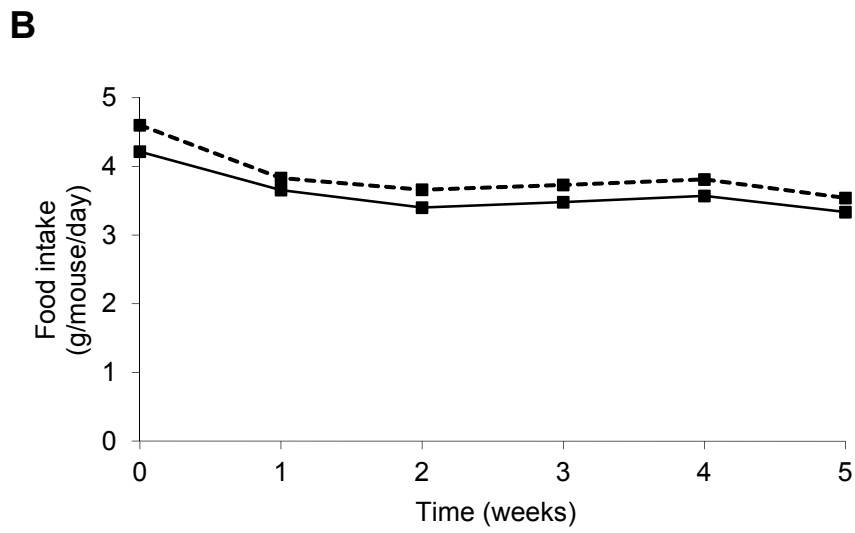

Supplement: mmc1.pdf [file mmc1.pdf]

**A**

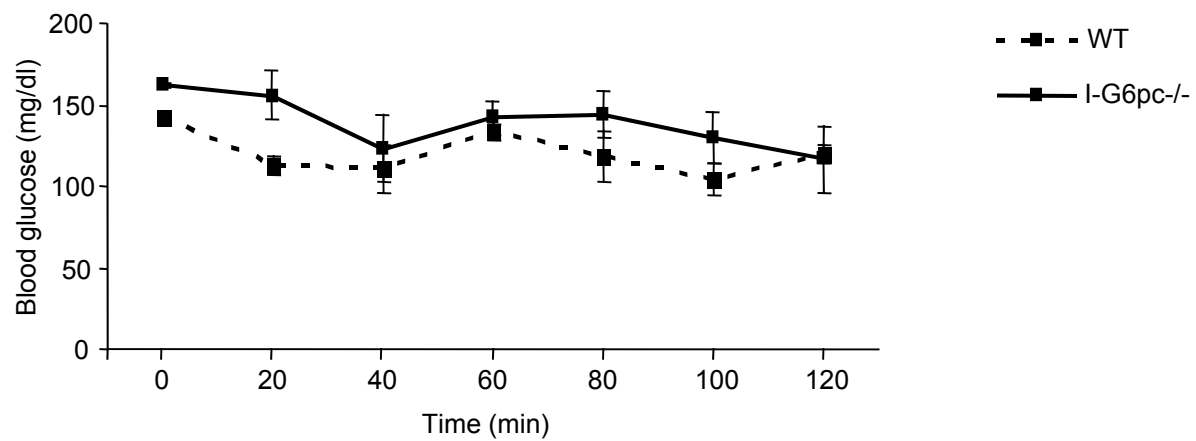

**B**

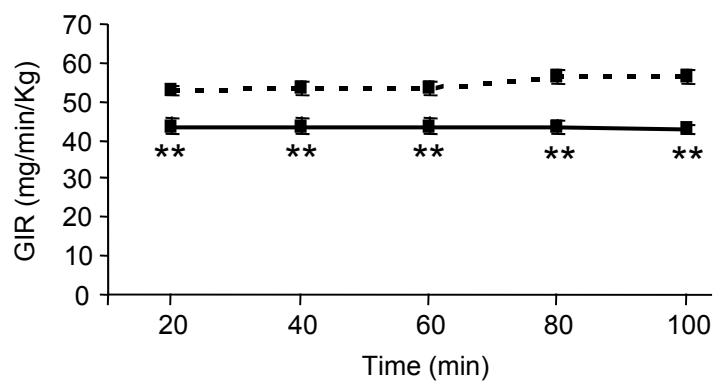

Supplement: mmc2.pdf [file mmc2.pdf]

**A**

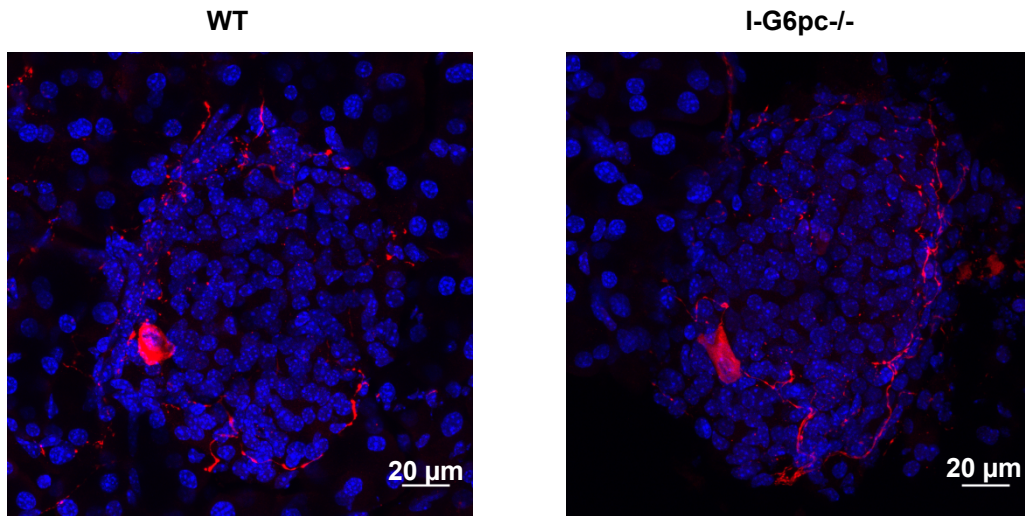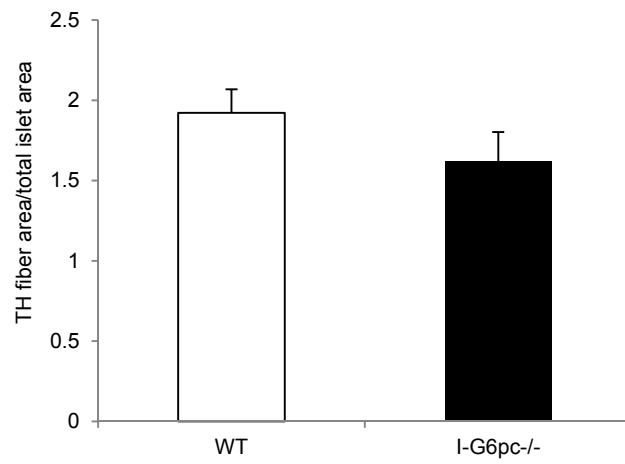

**B**

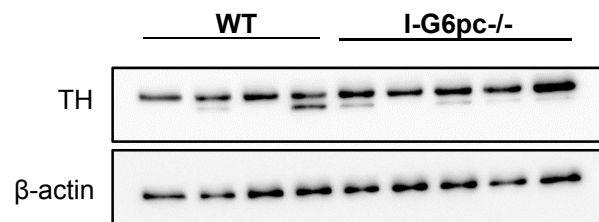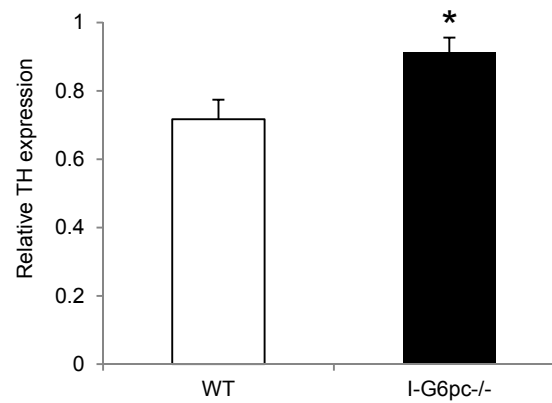

Supplement: mmc3.pdf [file mmc3.pdf]

Supplementary Figure.4

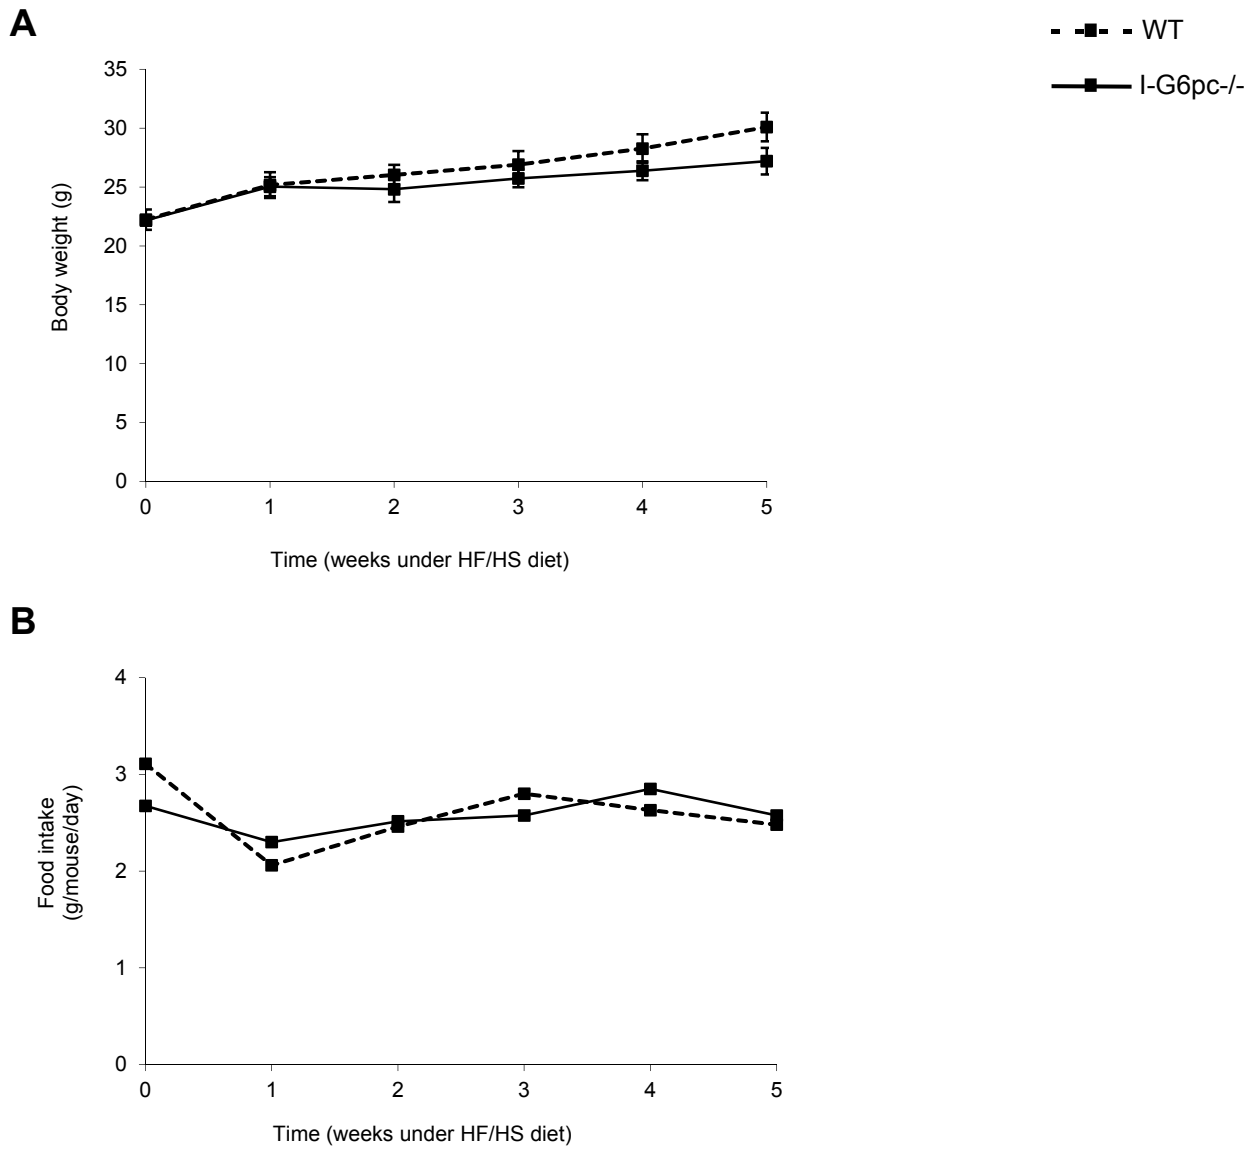

Supplement: mmc4.pdf [file mmc4.pdf]
